# Supplementary material for: Structure of the Bacterial Sex F Pilus Reveals an Assembly of a Stoichiometric Protein-Phospholipid Complex
Source: PubMed Central journal article supplement (PMC5018250; doi:10.1016/j.cell.2016.08.025), 2016-09-08
Supplement: mmc1.pdf [file mmc1.pdf]

**Cell, Volume 166**

**Supplemental Information**

**Structure of the Bacterial Sex F Pilus**

**Reveals an Assembly of a Stoichiometric**

**Protein-Phospholipid Complex**

**Tiago R.D. Costa, Aravindan Ilangovan, Marta Ukleja, Adam Redzej, Joanne M. Santini, Terry K. Smith, Edward H. Egelman, and Gabriel Waksman**

**Table S1 – Oligonucleotides used in this study (related to METHODS “Construction of mutants” section).**

| <b>Purpose</b>                                    | <b>Oligonucleotide name and sequence</b>                                                                                                                                                                                                                                                                                                                                                                                                                                                                                                                                              |
|---------------------------------------------------|---------------------------------------------------------------------------------------------------------------------------------------------------------------------------------------------------------------------------------------------------------------------------------------------------------------------------------------------------------------------------------------------------------------------------------------------------------------------------------------------------------------------------------------------------------------------------------------|
| Kanamycin cassette generation                     | TraA_KO2_F 5' – ATGAATTTATCCTTTGCAAAAGGCGGCCTCCCTG<br>CGCCTGTAAAAAACCGAATTAACCCTCACTAAAGGGCGG<br>TraA_KO2_R 5' – TCATTTGATGAAGGTAAGACCGACGGTAGTGAAGA<br>CGATAACCAACAACCATAATACGACTCACTATAGGGCTCG                                                                                                                                                                                                                                                                                                                                                                                      |
| <i>traA</i> allele cloning into modified pBAD-M11 | TraAinBAD_F 5' – CAGGAGGAATTAACCATGAATTTATCCTTTGCA<br>AAAGG<br>TraAinBAD_R 5' – AGCCAAGCTCTCTTATCATTGATGAAGGTAA<br>GACCG                                                                                                                                                                                                                                                                                                                                                                                                                                                              |
| <i>traA</i> mutagenesis                           | Y37F_F 5' – GCGATGTTTCATCCGCACCAAGAACC<br><br>Y37F_R 5' – GCGGATGAACATCGCCACACCGAC<br><br>Y37V_F 5' – GCGATGGTTATCCGCACCAAGAACC<br><br>Y37V_R 5' – GCGGATAACCATCGCCACACCGAC<br><br>A28F_F 5' – ATCATTTTCGAACTGATTGTCGGTGTGG<br><br>A28F_R 5' – CAGTTCGAAAATGATGATACACATCATGACG<br><br>A28N_F 5' – ATCATTAACGAACTGATTGTCGGTGTGG<br><br>A28N_R 5' – CAGTTCGTTAATGATGATACACATCATGACG<br><br>R39E_F 5' – TATATCGAAACCAAGAACCTGCTGATCC<br><br>R39E_R 5' – CTTGGTTTCGATATACATCGCCACACCGAC<br><br>R39A_F 5' – TATATCGCCACCAAGAACCTGCTGATCC<br><br>R39A_R 5' – CTTGGTGGCGATATACATCGCCACACCGAC |
